# Supplementary material for: TRAF6 Promotes PRMT5 Activity in a Ubiquitination-Dependent Manner
Source: MDPI journal article supplement (doi:10.3390/cancers15092501), 2023-04-27

# Original blots images for Figure 1

**Fig. 1A**

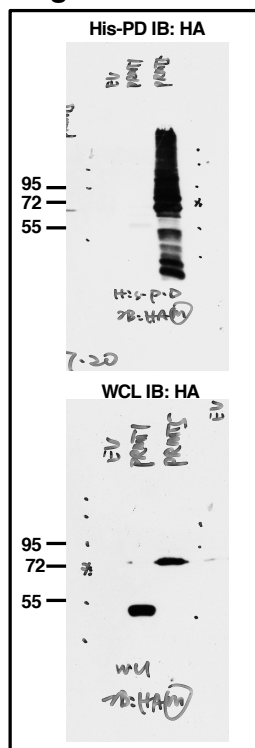

**Fig. 1B**

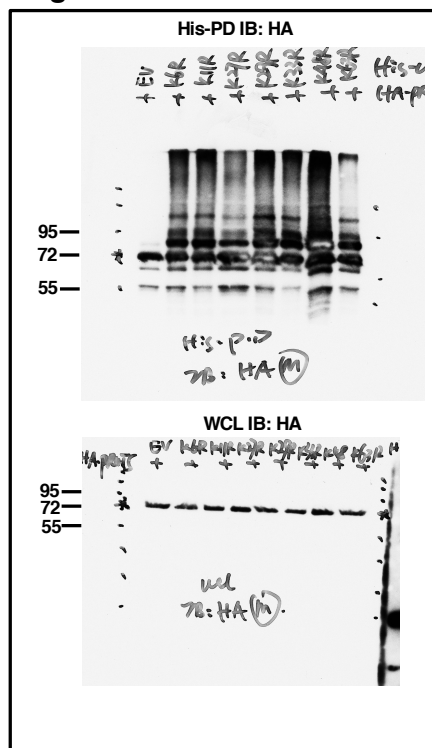

**Fig. 1C**

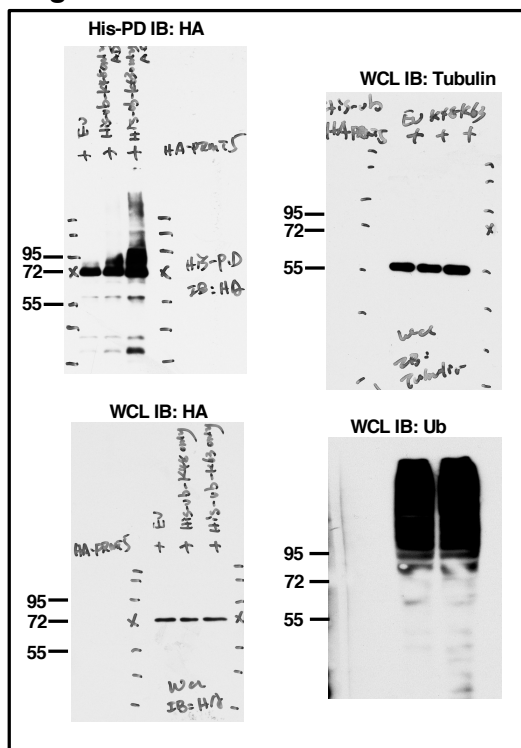

**Fig. 1D**

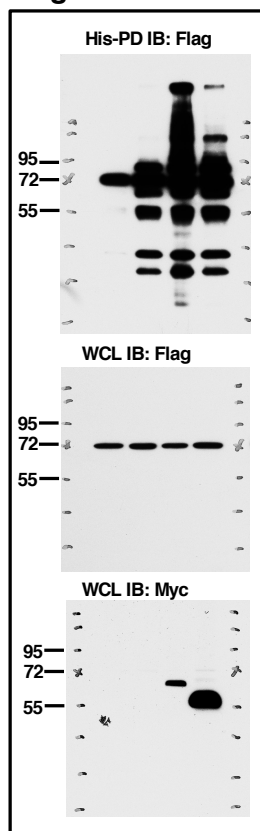

**Fig. 1E**

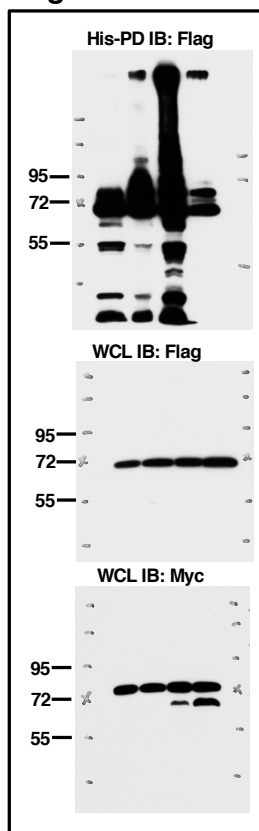

**Fig. 1F**

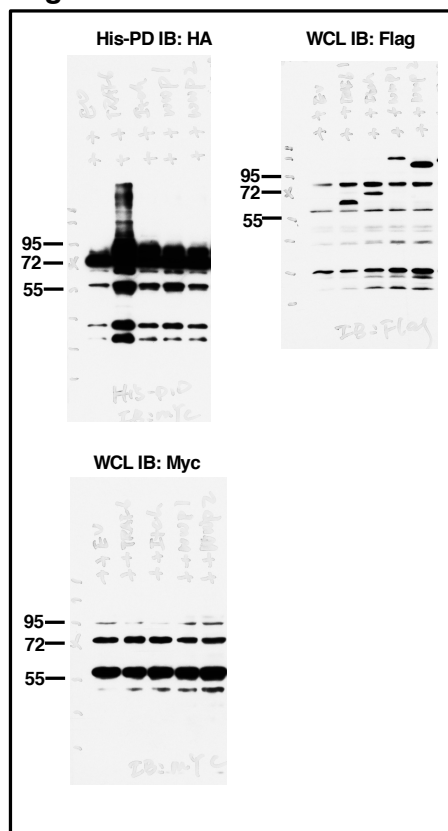

Original blots images for Figure 2

Fig. 2A

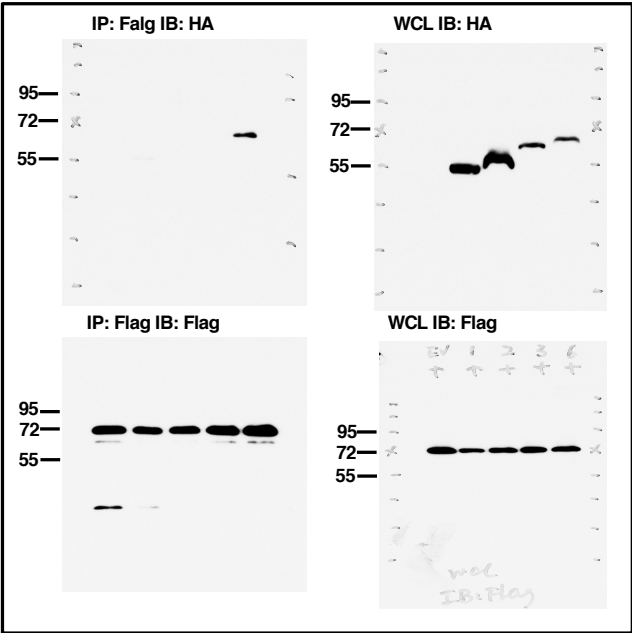

Fig. 2B

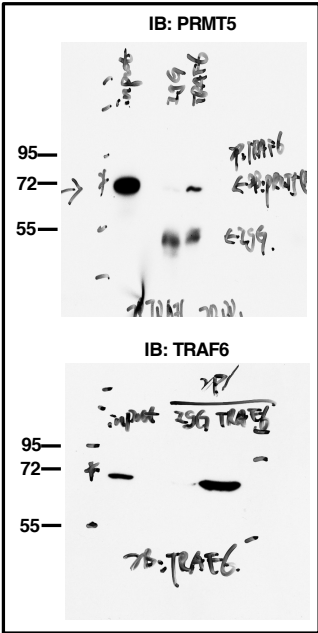

Fig. 2C

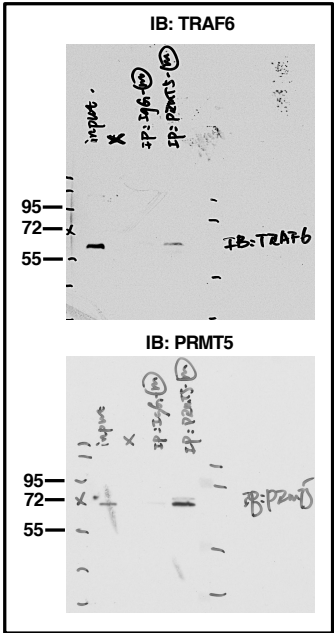

Fig. 2E

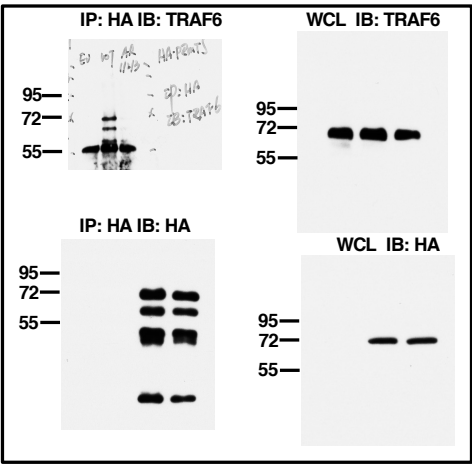

Fig. 2F

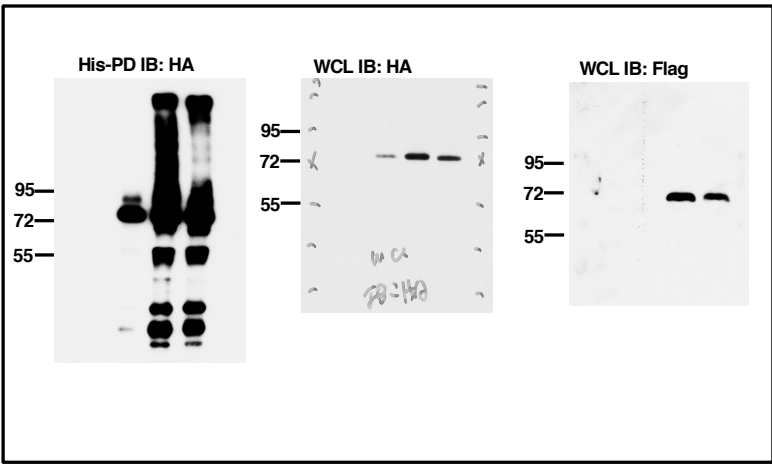

# Original blots images for Figure 3

Fig. 3B

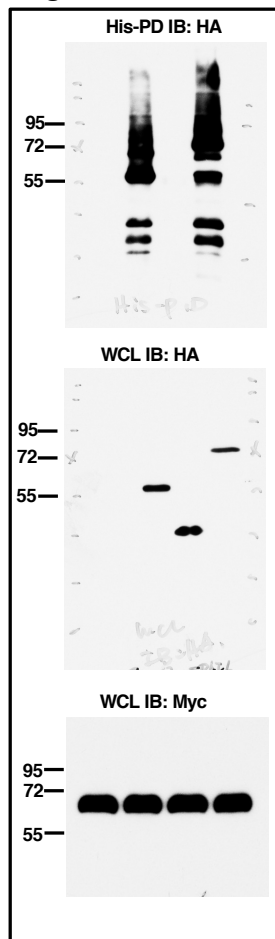

Fig. 3C

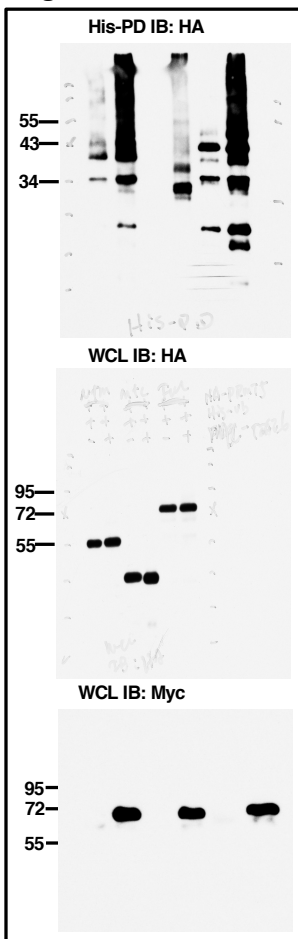

Fig. 3E

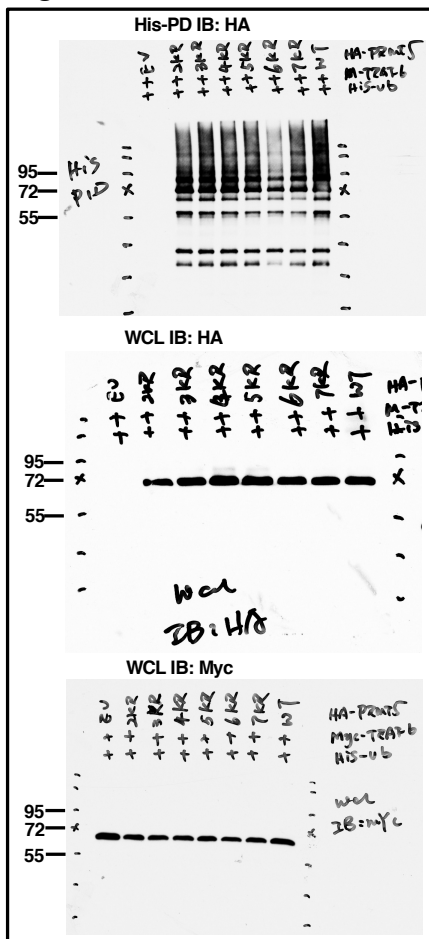

Fig. 3F

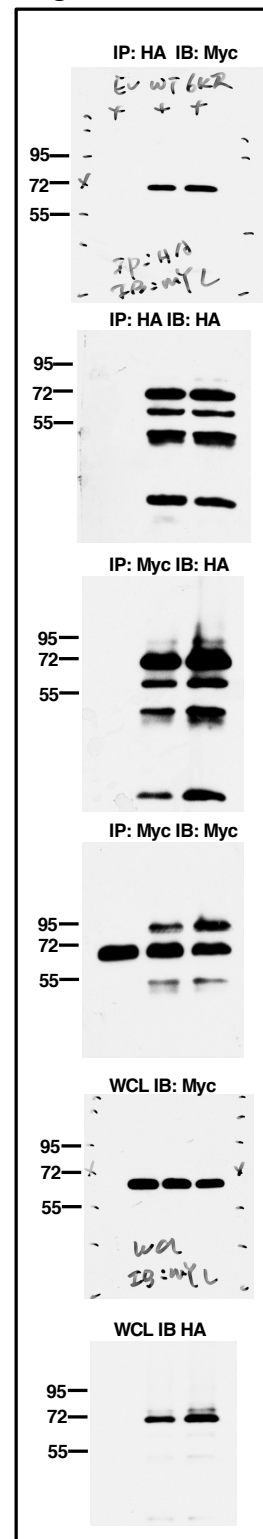

Original blots images for Figure 4

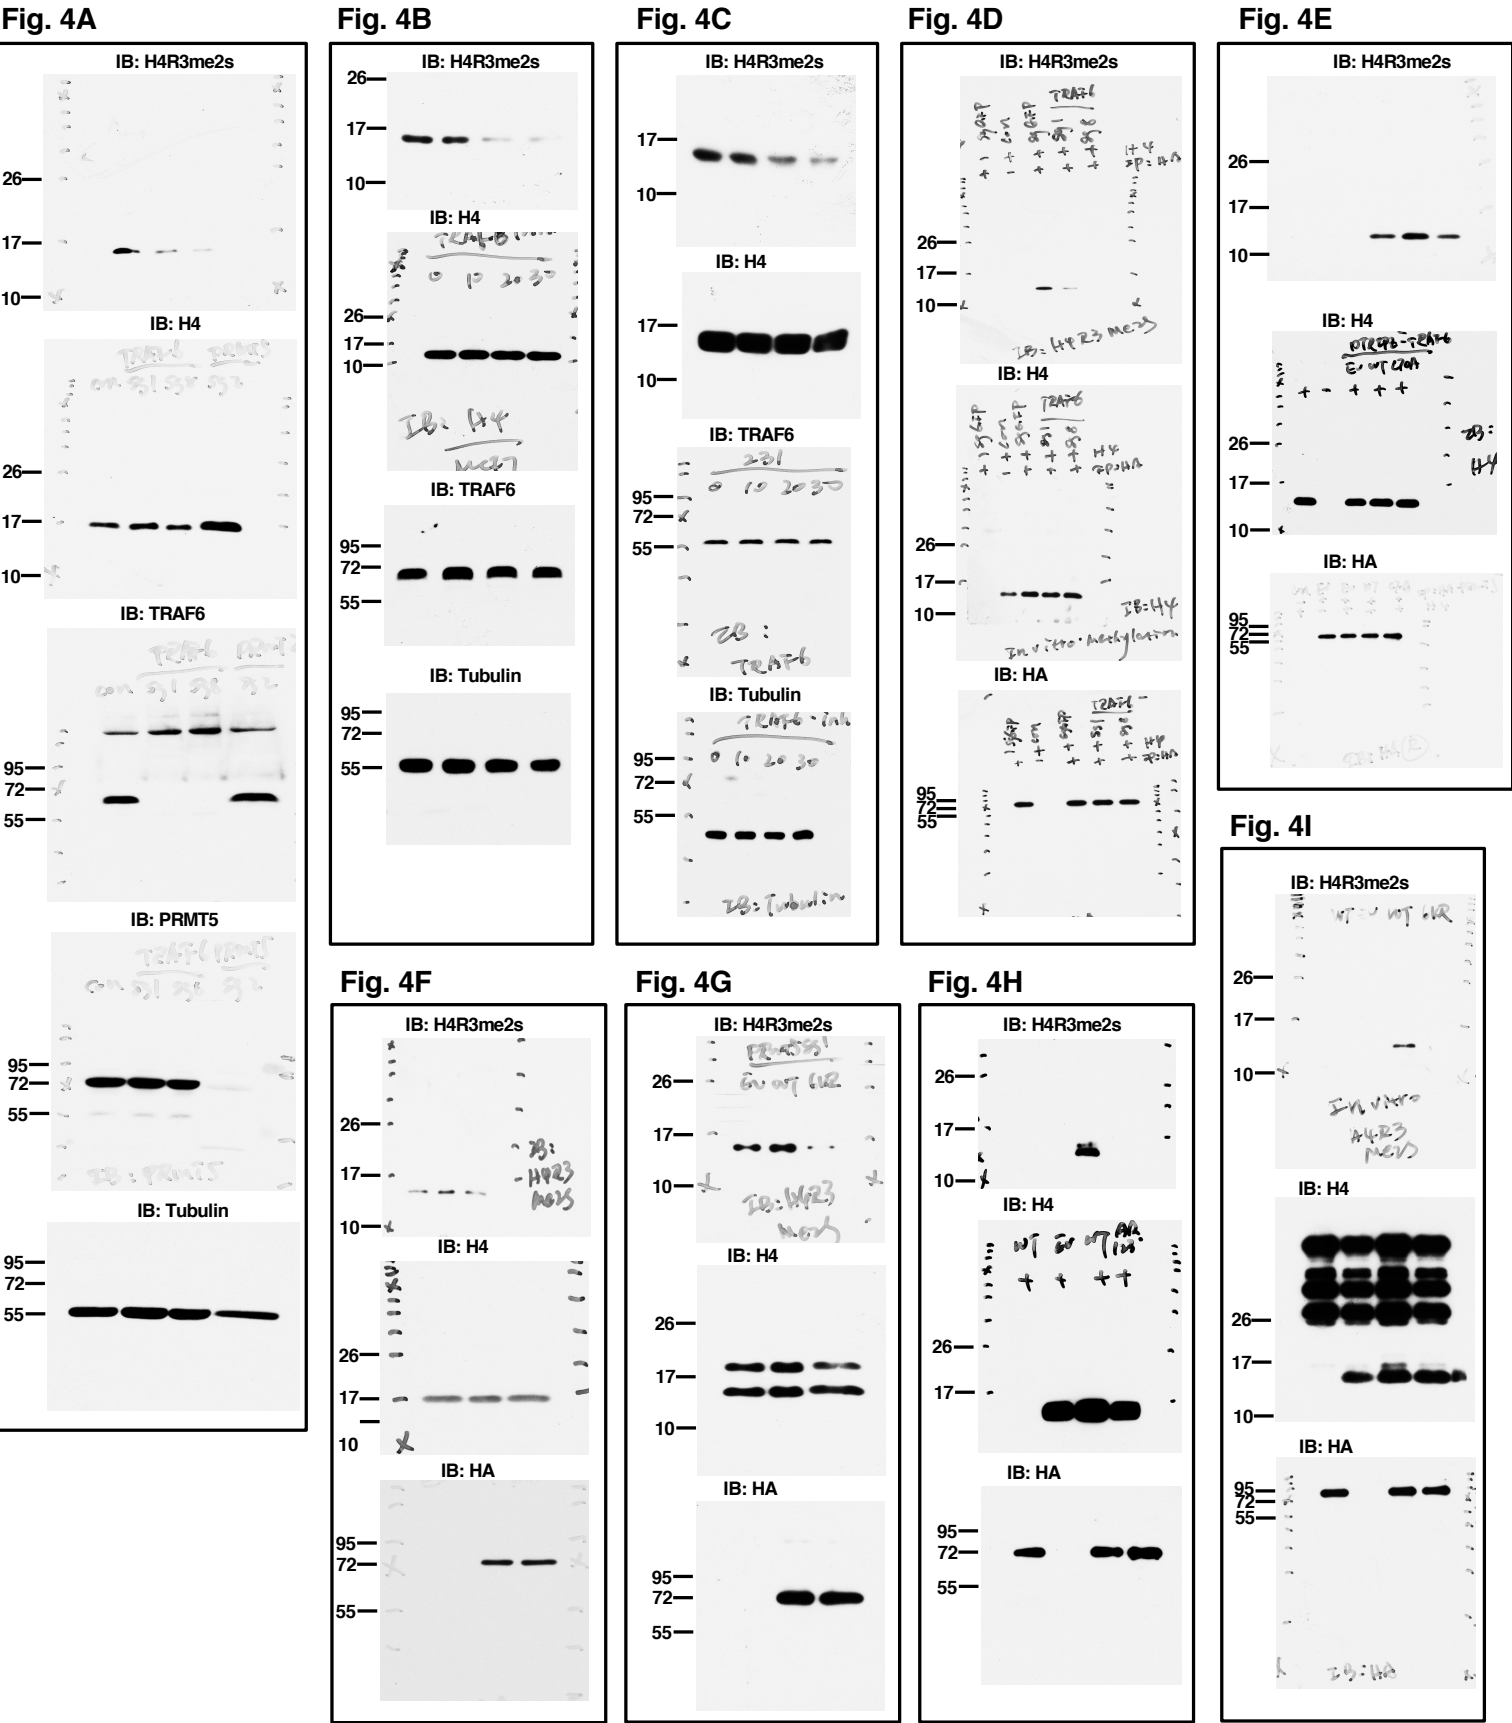

Original blots images for Figure 5

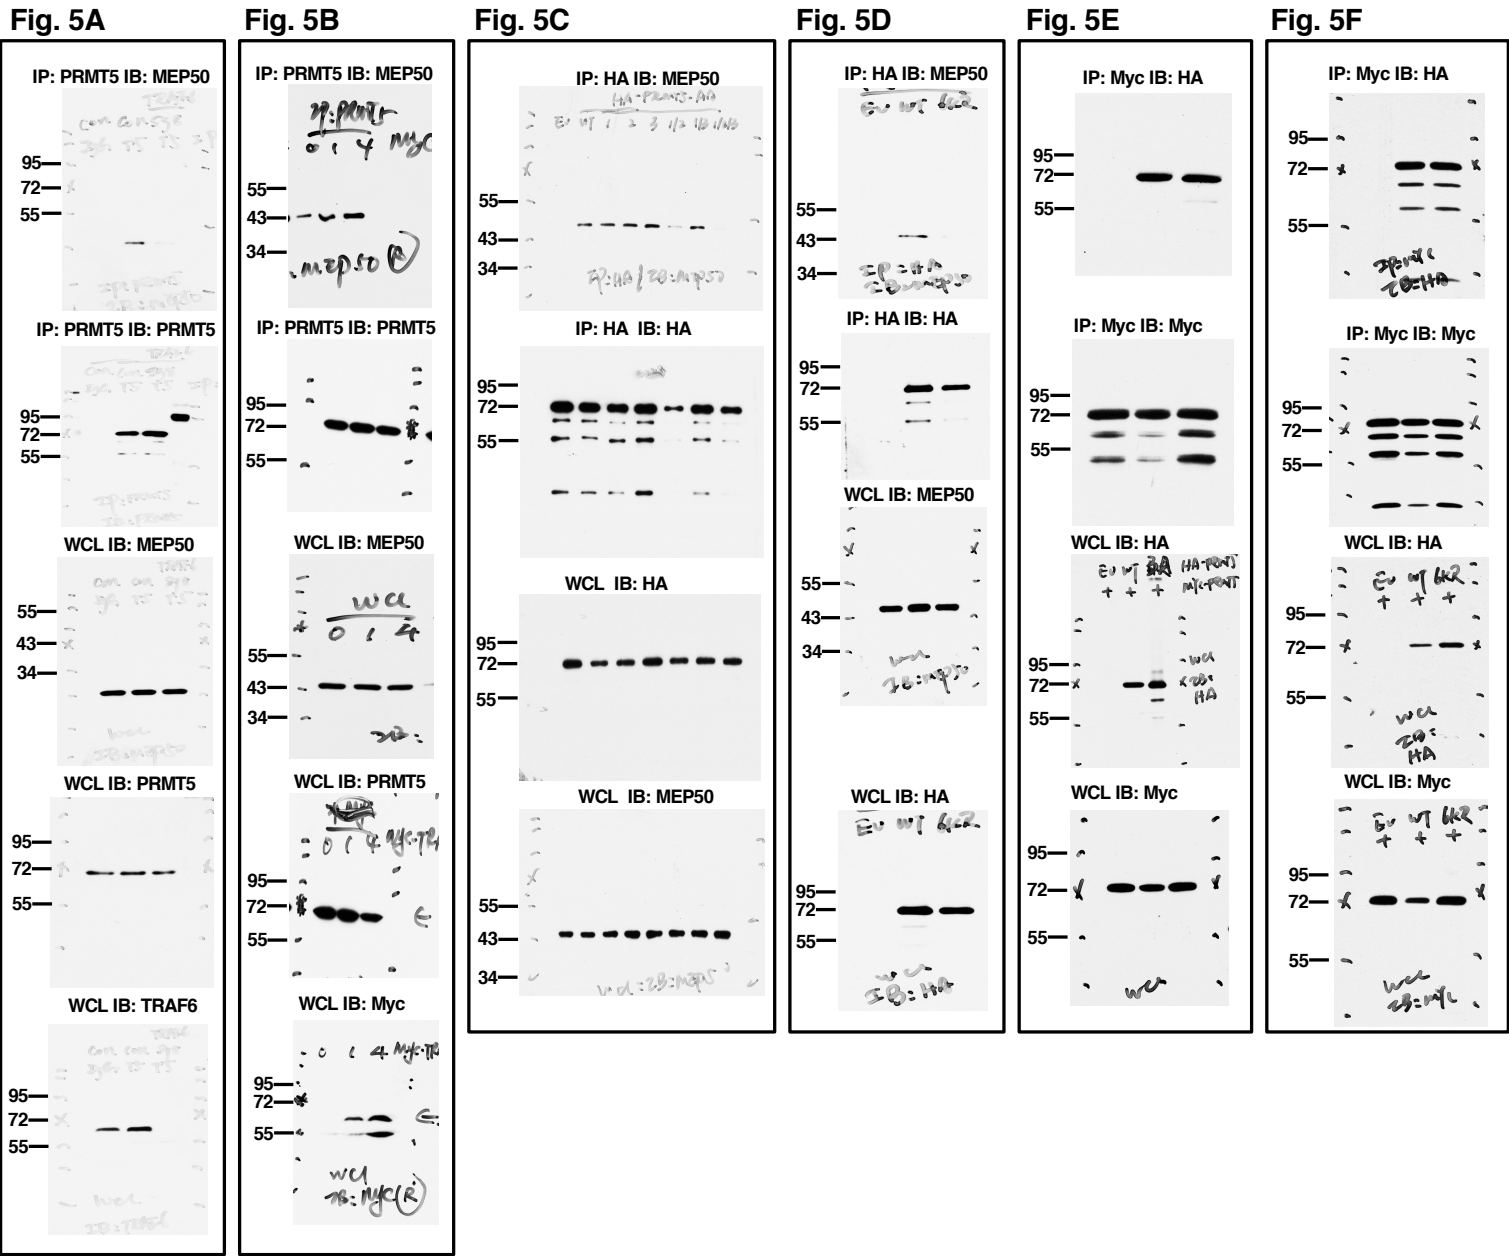

Original blots images for Figure 56

Fig. 6K

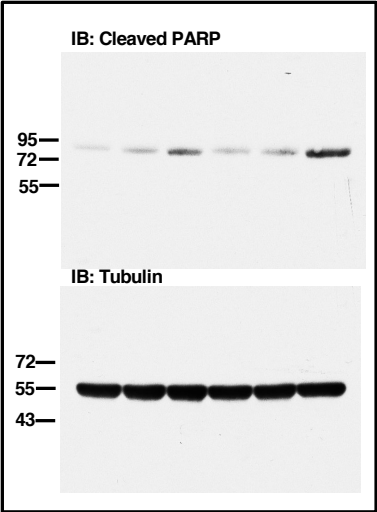

Supplement: s1 [file s1]
